# Supplementary material for: Injection into and extraction from single fungal cells
Source: PubMed Central journal article supplement (PMC8888671; doi:10.1038/s42003-022-03127-z), 2022-03-01
Supplement: 42003_2022_3127_MOESM3_ESM.pdf [file 42003_2022_3127_MOESM3_ESM.pdf]

## Description of Additional Supplementary Files

**File name:** Supplementary Data

**Description:** Source data for the graphs and charts presented in this manuscript.
